# Supplementary material
Source: publisher site journal article supplement (https://www.dovepress.com/get_supplementary_file.php?f=478956.docx)
Supplement: Supplementary file 1 [file get_supplementary_file.php]

## Appendix 1: Percentage distribution of respondents by opinion on performance planning

| **Statements** | **S.D** | **D** | **N** | **A** | **S.A** |
| --- | --- | --- | --- | --- | --- |
| ***Professional competence*** |  |  |  |  |  |
| Iam equipped with adequate knowledge on HIV/AIDS prevention | 13.8 | 53.8 | 1.8 | 28.8 | 0 |
| Iam equipped with adequate knowledge on HIV/AIDS treatment | 8.8 | 63.8 | 3.8 | 10.8 | 13.8 |
| Iam adequately skilled to effectively deliver HIV/AIDS control services to the community | 12.5 | 50.0 | 0 | 27.5 | 10.0 |
| Iam adequately experienced in delivering HIV/AIDS prevention services | 13.8 | 56.3 | 6.3 | 0 | 23.8 |
| Iam adequately experienced in delivering HIV/AIDS treatment services | 17.5 | 60.0 | 2.5 | 15.0 | 10.0 |
| Iam adequately experienced in delivering HIV/AIDS care services | 36.3 | 38.8 | 5.0 | 14.6 | 5.4 |
| I feel a sense of commitment to deliver HIV/AIDS prevention, care & treatment services | 10.0 | 12.5 | 3.8 | 60.0 | 13.8 |
| Iam adequately knowledgeable about the legal requirements in delivering HIV/AIDS prevention, care and treatment services | 39.0 | 39.7 | 0.0 | 17.1 | 4.1 |
| Iam adequately knowledgeable about the ethical standards in delivering HIV/AIDS prevention, care and treatment services | 4.0 | 20.0 | 5.4 | 40.0 | 30.6 |
| Iam skilled enough to comply with the ethical standards in delivering HIV/AIDS prevention, care and treatment services | 20.3 | 41.6 | 6.7 | 29.4 | 3.0 |
| Iam able to talk openly to elite groups about HIV/AIDS | 37.3 | 37.0 | 15.1 | 10.0 | 0.7 |
| Iam often able to convice their clients to disclose their HIV/AID status | 21.7 | 48.6 | 9.0 | 0.7 | 0.0 |
| Iam often able to advise my clients on the benefits associated with disclosure of their HIV/AIDS status | 28.3 | 1.4 | 8.6 | 51.7 | 10.0 |
| I have fear of getting HIV/AIDS infection through handling my clients | 0.7 | 0.0 | 15.1 | 37.0 | 37.3 |
| ***Cultural competence*** |  |  |  |  |  |
| I work under an environment of cultural diversity | 4.6 | 25.4 | 2.9 | 38.9 | 28.2 |
| I do appreciate cultural diversity among clients | 0 | 33.8 | 3.8 | 40.0 | 22.5 |
| Iam able to deliver HIV/AIDS services under diverse cultural diversity | 25.4 | 38.9 | 2.9 | 28.2 | 4.6 |
| Iam able to deliver HIV/AIDS services under negative beliefs about some HIV/AIDS prevention or treatment programmes | 20.0 | 50.6 | 5.4 | 20.0 | 4.0 |
| Iam able to work in a multi-professional team | 12.2 | 20.0 | 3.8 | 53.8 | 12.5 |
| ***Success of HIV/AIDS control program*** |  |  |  |  |  |
| My clients have adopted practices which minimize the risk HIV infection | 4.6 | 72.3 | 1.5 | 14.5 | 7.1 |
| The rate of HIV infection is increasing within the community of the clients I work with | 1.4 | 67.6 | 1.5 | 24.3 | 5.2 |
| The viral load suppression is increasing among my clients | 1.1 | 69.9 | 1.5 | 20.4 | 7.1 |
| The rate of HIV/AIDS related death has increased among the clients I serve | 2.1 | 16.7 | 1.2 | 74.6 | 5.2 |
| Generally, I have registered success in HIV/AIDS prevention within the community | 2 | 73.5 | 0.8 | 21.4 | 2.3 |

***Source: Field survey data***
